# Supplementary material for: Characterization of retinal function and structure in the MPTP murine model of Parkinson’s disease
Source: PubMed Central journal article supplement (PMC9085791; doi:10.1038/s41598-022-11495-z), 2022-05-09
Supplement: 41598_2022_11495_MOESM1_ESM.pdf [file 41598_2022_11495_MOESM1_ESM.pdf]

**Supplementary Information: Characterization of Retinal Function & Structure in the MPTP Murine Model of Parkinson's Disease**

*Katie KN Tran*<sup>1</sup>, *Vickie HY Wong*<sup>1</sup>, *Jeremiah KH Lim*<sup>1\*</sup>, *Ali Shahandeh*<sup>1</sup>, *Anh Hoang*<sup>1</sup>, *David I. Finkelstein*<sup>2</sup>, *Bang V. Bui*<sup>1</sup>, *Christine T.O. Nguyen*<sup>1#</sup>

<sup>1</sup> Ocular Biomarkers Laboratory, Department of Optometry and Vision Sciences, University of Melbourne, Parkville, 3010, Victoria, Australia.

<sup>2</sup> Parkinson's Disease Laboratory, The Florey Institute of Neuroscience and Mental Health, The University of Melbourne, Parkville, 3010, Victoria, Australia.

\*Current address: Caring Futures Institute, College of Nursing and Health Sciences, Flinders University, Bedford Park, 5042, South Australia, Australia

**#Correspondence:** Christine TO Nguyen: Department of Optometry and Vision Sciences, University of Melbourne, Parkville, 3010, Victoria, Australia.

Ph: +61 3 9035 3186

E: christine.nguyen@unimelb.edu.au

## Supplementary Figures

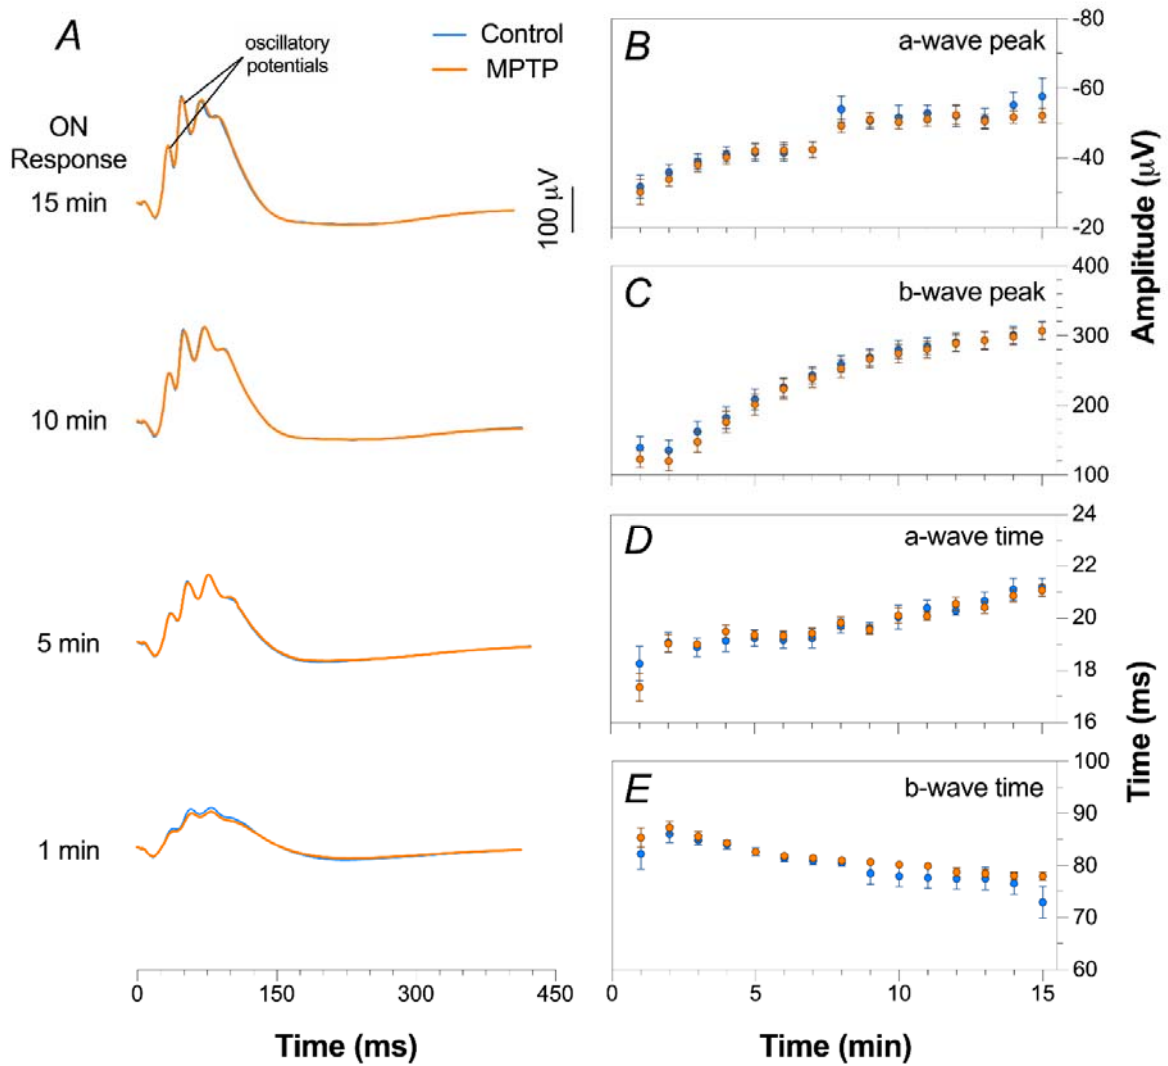

**Supplementary figure 1: Day 21 photopic ERG waveform growth summary.** (A) Representative ERG cone waveforms for control (n = 14, blue) and MPTP (n = 15, orange) cohorts, gradually growing to full saturation at 15 min. (B & C) a-wave and b-wave amplitude growth respectively over the 15 min light adaptation period. (D & E) a-wave and b-wave peak times respectively over the 15 min light adaptation period.

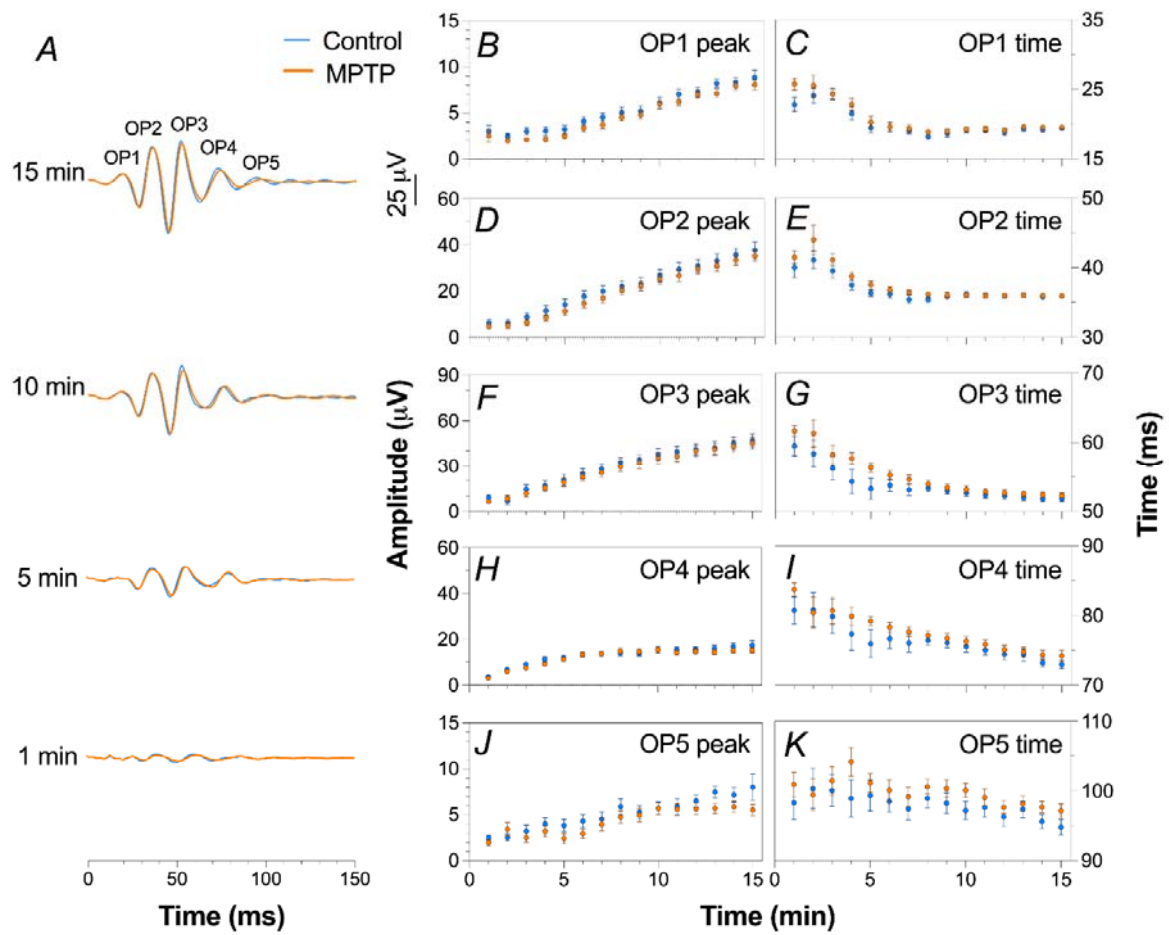

**Supplementary figure 2: Day 21 photopic OP waveform growth summary.** (A) Representative oscillatory potentials (OPs) for control ( $n = 14$ , blue) and MPTP ( $n = 15$ , orange) cohorts, growing to full saturation at 15 min. (B & C) OP1 peak and timing growth. (D & E) OP2 peak and timing growth. (F & G) OP3 peak and timing growth. (H & I) OP4 peak and timing growth. (J & K) OP5 peak and timing growth.

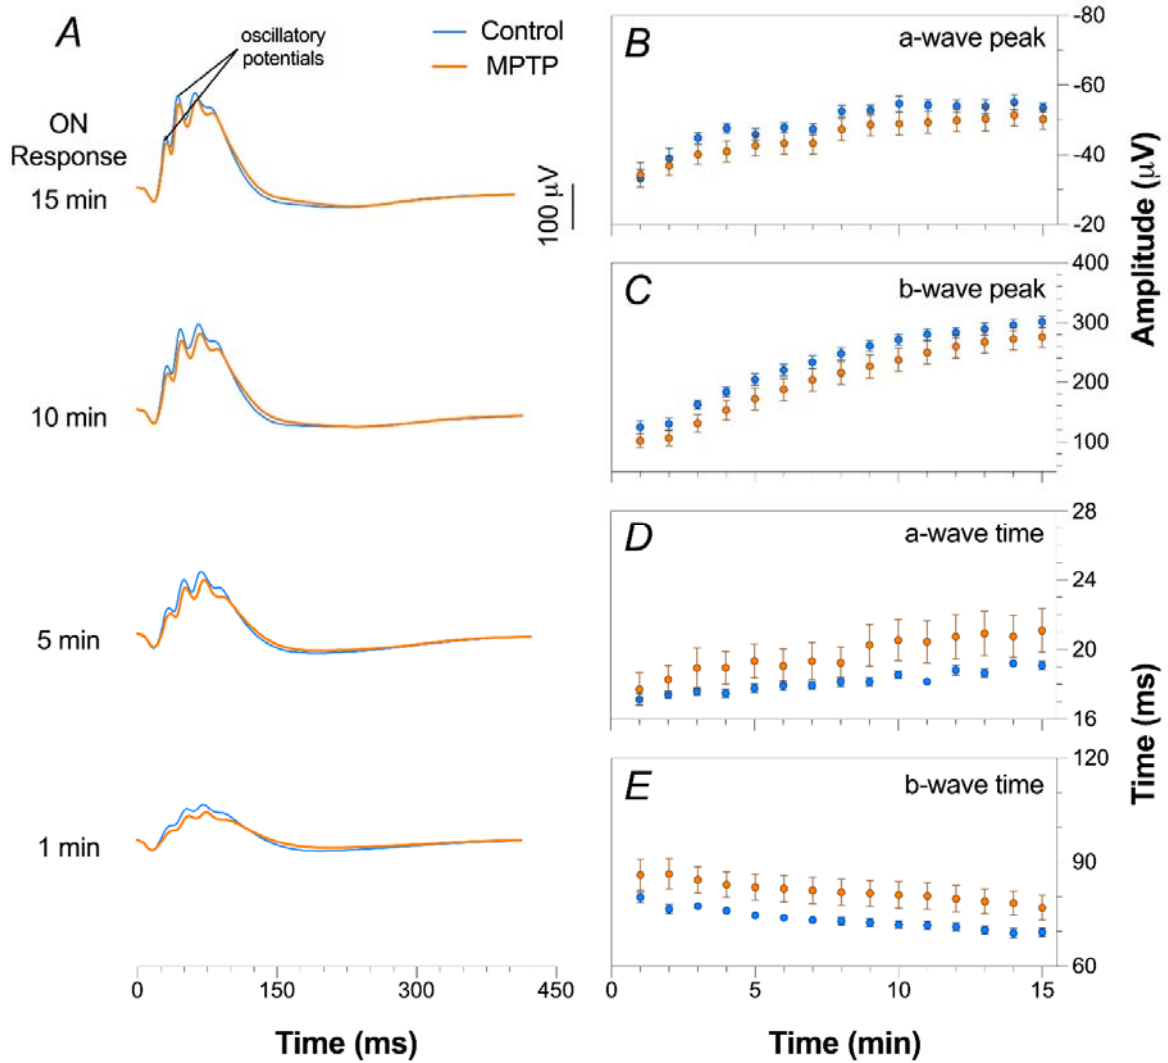

**Supplementary figure 3: Day 45 photopic ERG waveform growth summary.** (A) Representative ERG cone waveforms for control (n = 12, blue) and MPTP (n = 15, orange) cohorts, gradually growing to full saturation at 15 min. (B & C) a-wave and b-wave amplitude growth respectively over the 15 min light adaptation period. (D & E) a-wave and b-wave peak times respectively over the 15 min light adaptation period.

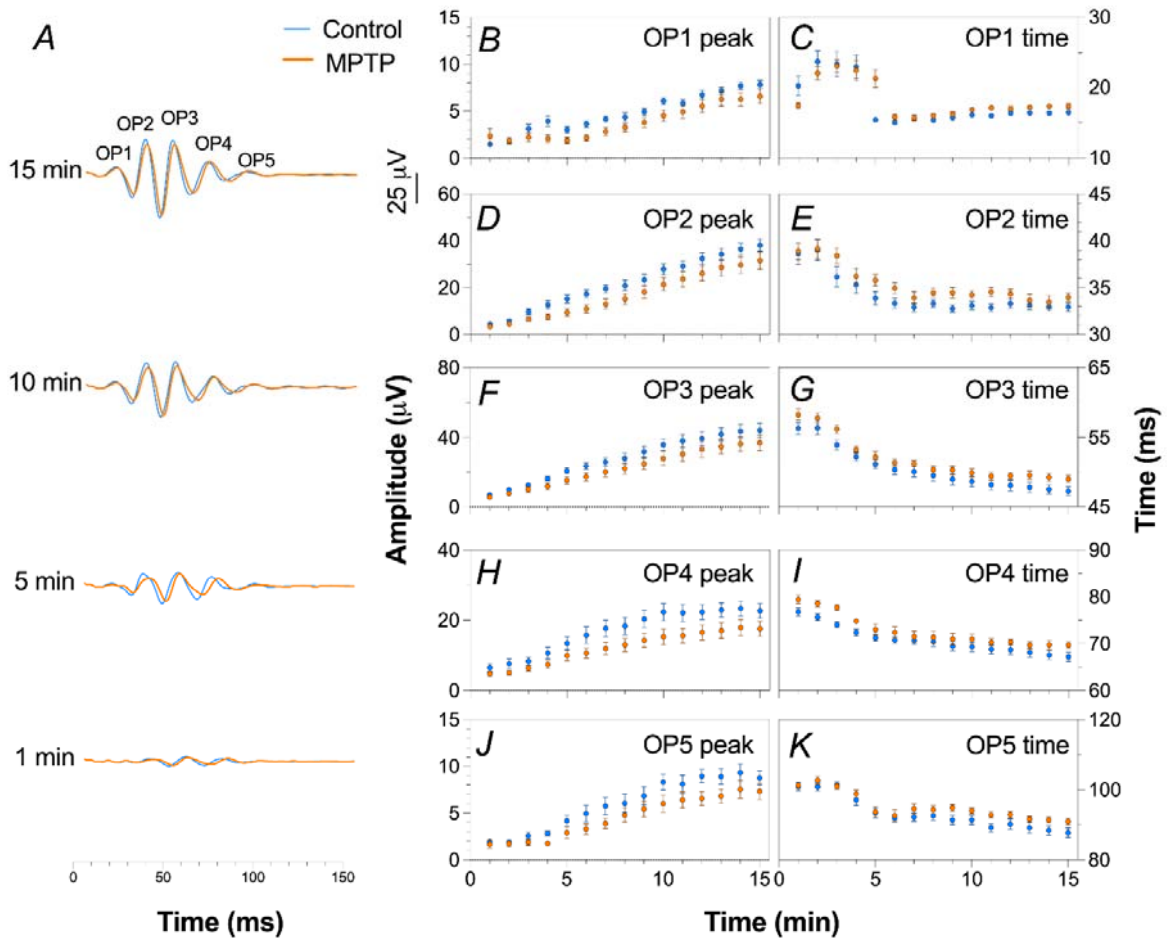

**Supplementary figure 4: Day 45 photopic OP waveform growth summary.** (A) Representative oscillatory potentials (OPs) for control ( $n = 12$ , blue) and MPTP ( $n = 15$ , orange) cohorts, growing to full saturation at 15 min. (B & C) OP1 peak and timing growth. (D & E) OP2 peak and timing growth. (F & G) OP3 peak and timing growth. (H & I) OP4 peak and timing growth. (J & K) OP5 peak and timing growth.

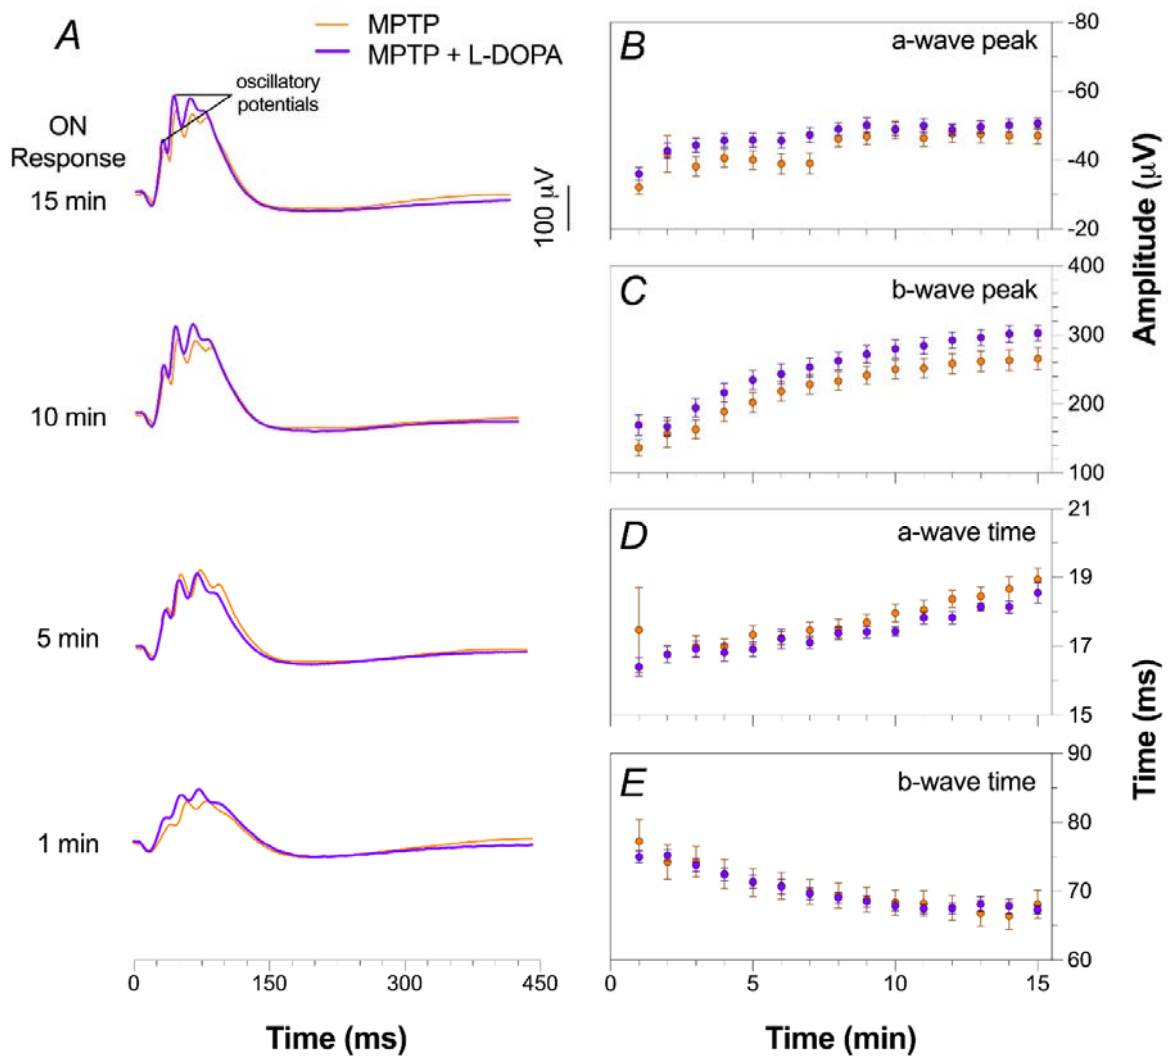

**Supplementary figure 5: Day 45 L-DOPA photopic ERG waveform growth summary.** (A) Representative ERG cone waveforms for MPTP positive control (n = 14, orange) and MPTP + L-DOPA (n = 12, purple) cohorts, gradually growing to full saturation at 15 min. (B & C) a-wave and b-wave amplitude growth respectively over the 15 min light adaptation period. (D & E) a-wave and b-wave peak times respectively over the 15 min light adaptation period.

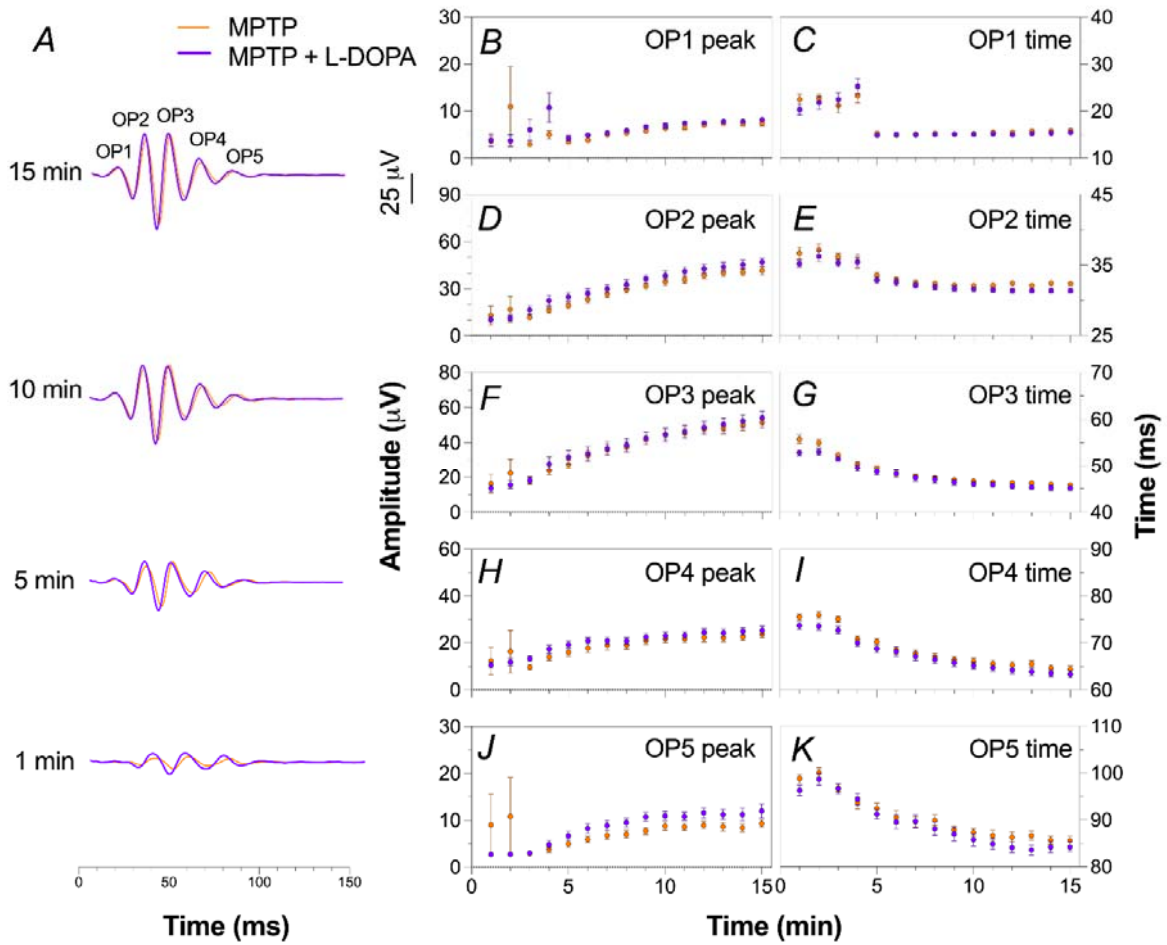

**Supplementary figure 6: Day 45 L-DOPA photopic OP waveform growth summary.** (A) Representative oscillatory potentials (OPs) for MPTP positive control (n = 14, orange) and MPTP + L-DOPA (n = 12, purple) cohorts, growing to full saturation at 15 min. (B & C) OP1 peak and timing growth. (D & E) OP2 peak and timing growth. (F & G) OP3 peak and timing growth. (H & I) OP4 peak and timing growth. (J & K) OP5 peak and timing growth.
